# Supplementary material for: Immune-regulating strategy against rheumatoid arthritis by inducing tolerogenic dendritic cells with modified zinc peroxide nanoparticles
Source: PubMed Central journal article supplement (PMC9281050; doi:10.1186/s12951-022-01536-0), 2022-07-14
Supplement: 12951_2022_1536_MOESM1_ESM.pdf [file 12951_2022_1536_MOESM1_ESM.pdf]

# **Immune-regulating strategy against rheumatoid arthritis by inducing tolerogenic dendritic cells with modified zinc peroxide nanoparticles**

Han Qiao<sup>1,2,#</sup>, Jingtian Mei<sup>1,2,#</sup>, Kai Yuan<sup>1,2</sup>, Kai Zhang<sup>1,2</sup>, Feng Zhou<sup>3</sup>, Tingting Tang<sup>1,2,\*</sup>, Jie Zhao<sup>1,2,\*</sup>

1. Department of Orthopaedic Surgery, Shanghai Ninth People's Hospital, Shanghai Jiao Tong University School of Medicine, Shanghai, China PR.

2. Shanghai Key Laboratory of Orthopaedic Implants, Shanghai Ninth People's Hospital, Shanghai Jiao Tong University School of Medicine, Shanghai, China PR.

3. Department of Orthopaedic Surgery, The First Affiliated Hospital of Soochow University, Suzhou, Jiangsu Province, China PR.

# These authors contributed equally to this work.

\*Corresponding to:

Jie Zhao, Ph.D., M.D., Department of Orthopaedics, Shanghai Ninth People's Hospital, Shanghai Jiao Tong University School of Medicine, Shanghai Key Laboratory of Orthopaedic Implants, 639 Zhizaoju Road, Shanghai 200011, China PR. E-mail, profzhaojie@126.com;

Also corresponding to:

Tingting Tang, Ph.D., M.D., Department of Orthopaedics, Shanghai Ninth People's Hospital, Shanghai Jiao Tong University School of Medicine, Shanghai Key Laboratory of Orthopaedic Implants, 639 Zhizaoju Road, Shanghai 200011, China PR. E-mail, ttt@sjtu.edu.cn

## Supplementary Information

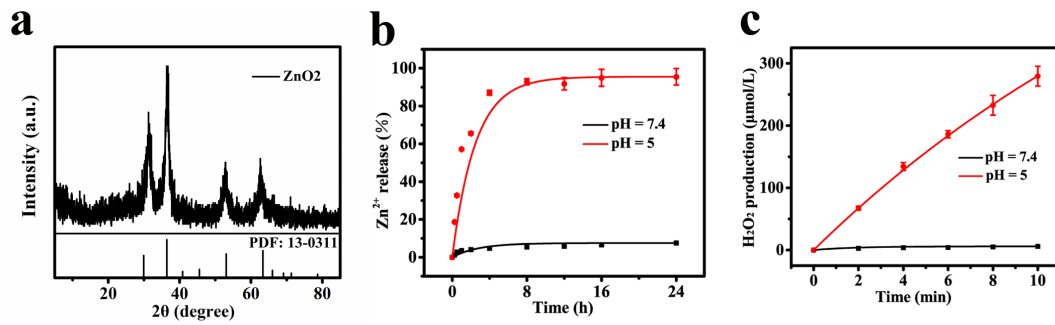

**Supplementary Figure 1.** (a) XRD pattern of ZnO<sub>2</sub> NPs. (b) Zn<sup>2+</sup> released from ZnO<sub>2</sub> (100 µg/mL) NPs under different pH values. (c) H<sub>2</sub>O<sub>2</sub> released from ZnO<sub>2</sub> (1 mg/mL) NPs under different pH values.

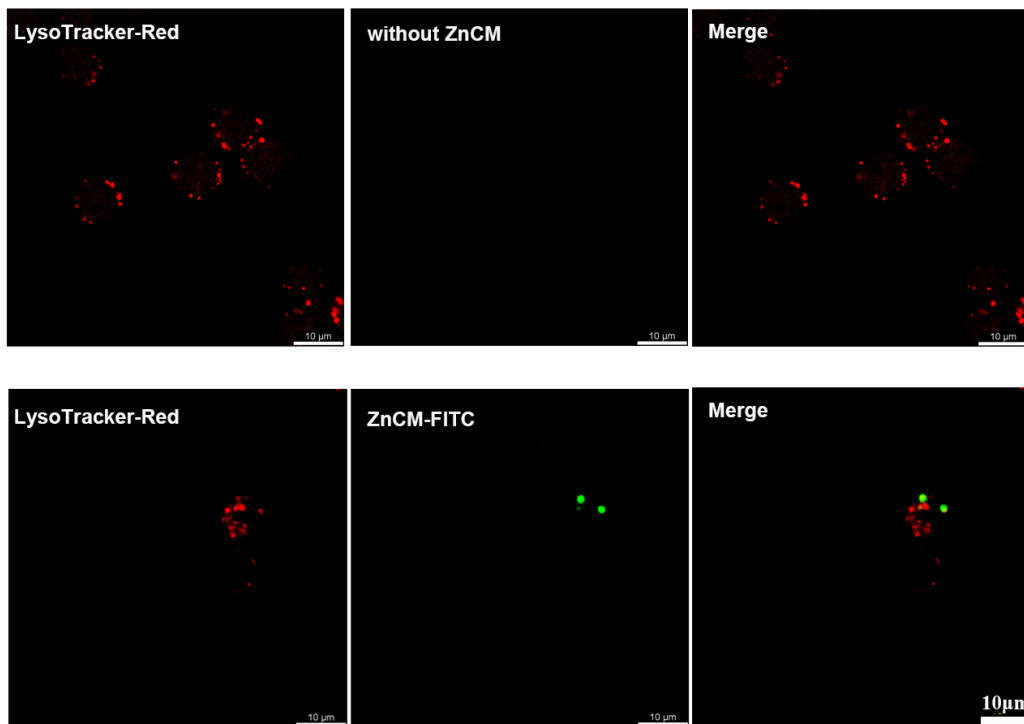

**Supplementary Figure 2.** Colocalization of ZnCM NPs within DCs lysosomes. CLSM observations after DCs were treated with non-toxic fluorescent ZnCM NPs.

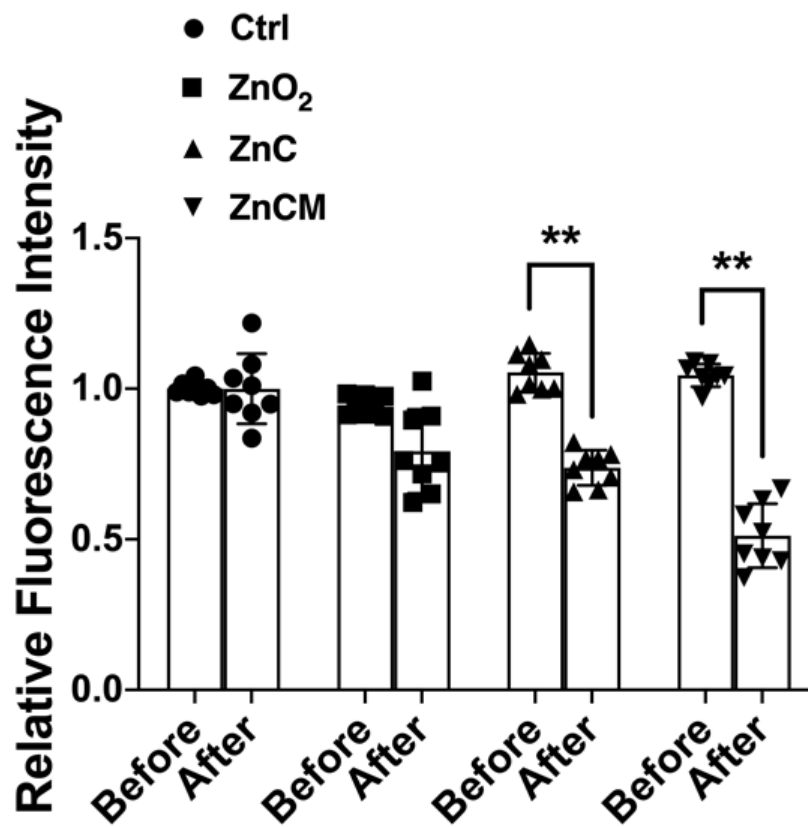

**Supplementary Figure 3.** Quantitative intracellular hypoxia state in DCs before and after various NPs treatments. \*\* indicated the significant difference of  $p \leq 0.05$ .

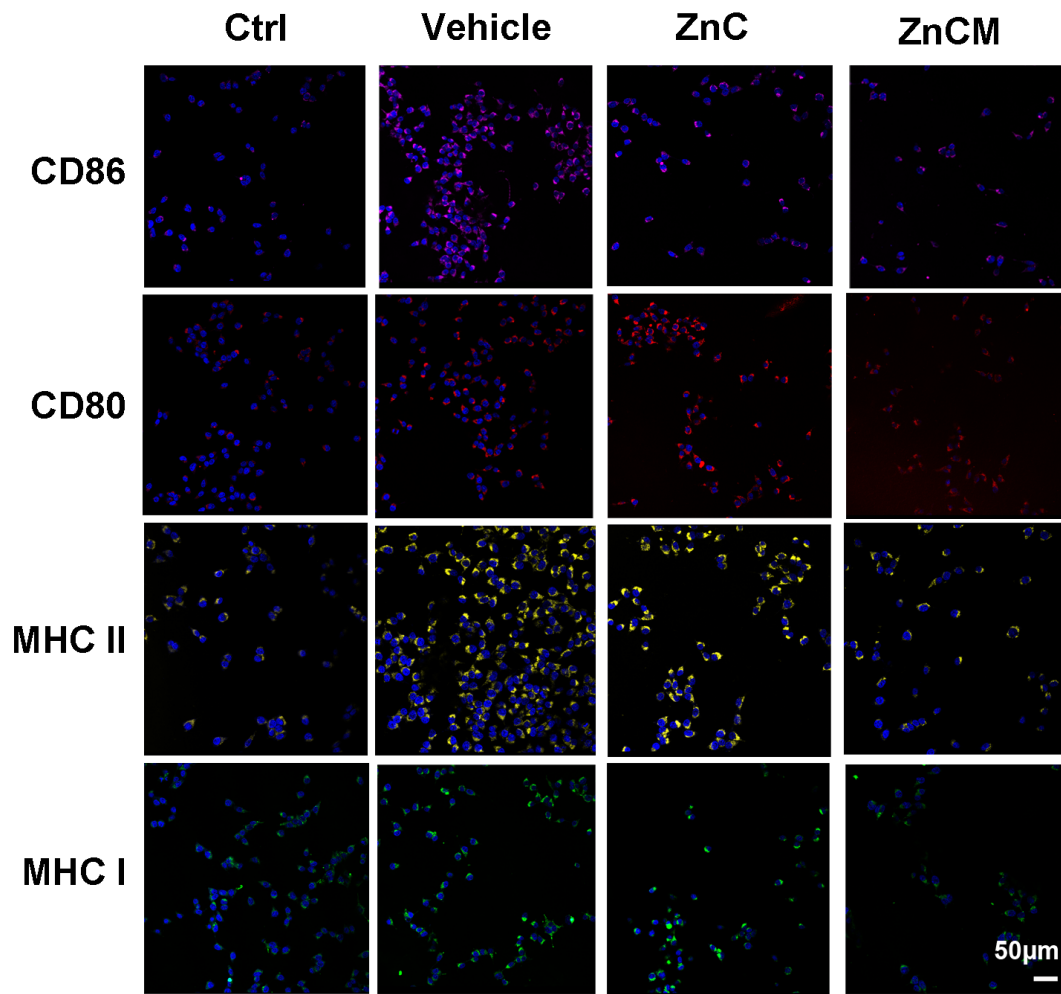

**Supplementary Figure 4. Repression of igDCs (signal 1,2) after NPs treatment. CLSM observations of igDCs molecules after various NPs treatments.**

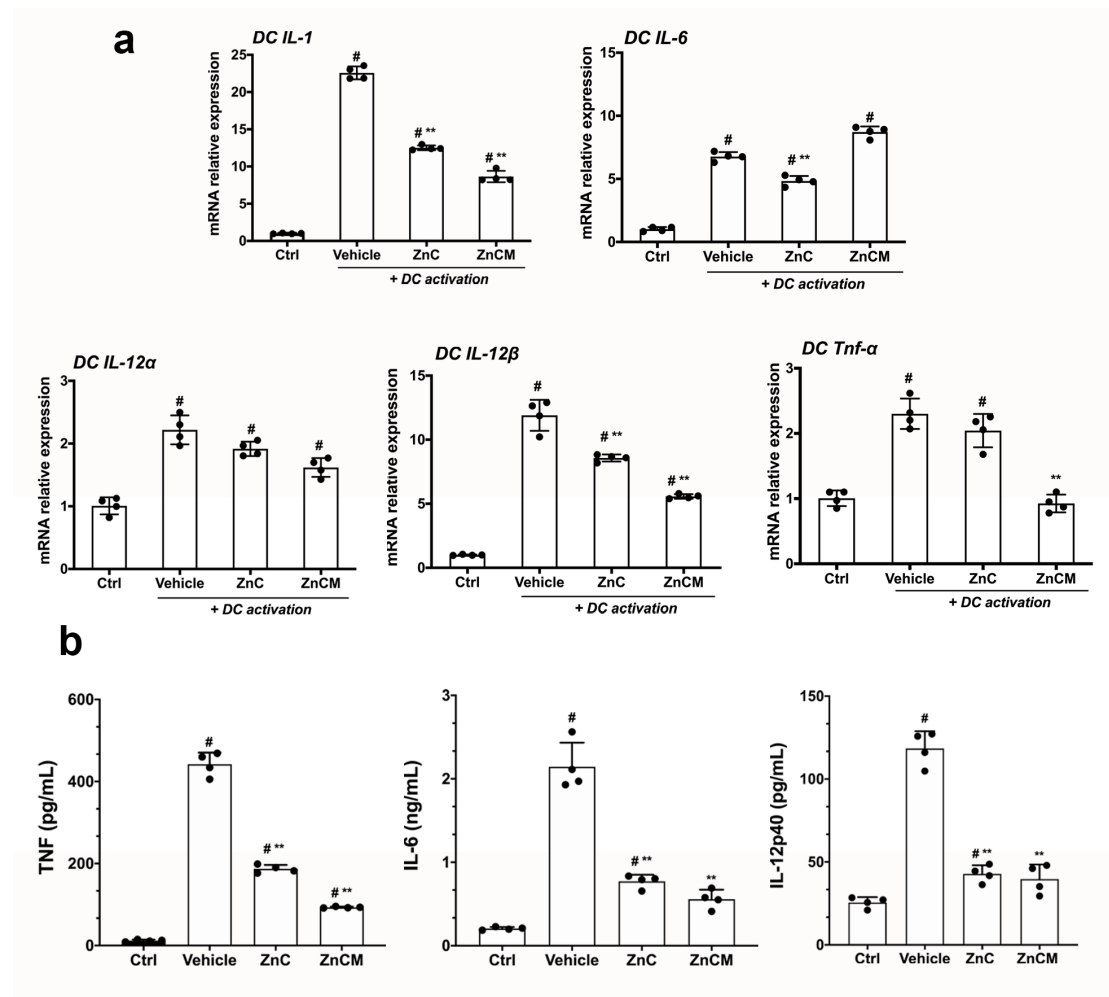

**Supplementary Figure 5. Repression of igDCs (signal 3) after NPs treatment.** (a) mRNA level of immune cytokines from igDCs treated with NPs towards T cell homeostasis regulation. (b) Cytometric bead array (CBA) immunoassay analyzing the levels of TNF, IL-6, and IL-12 from igDCs treated with NPs. \*\* indicated the significant difference of  $p \leq 0.05$  compared with Vehicle, # indicated the significant difference of  $p \leq 0.05$  compared with Ctrl.

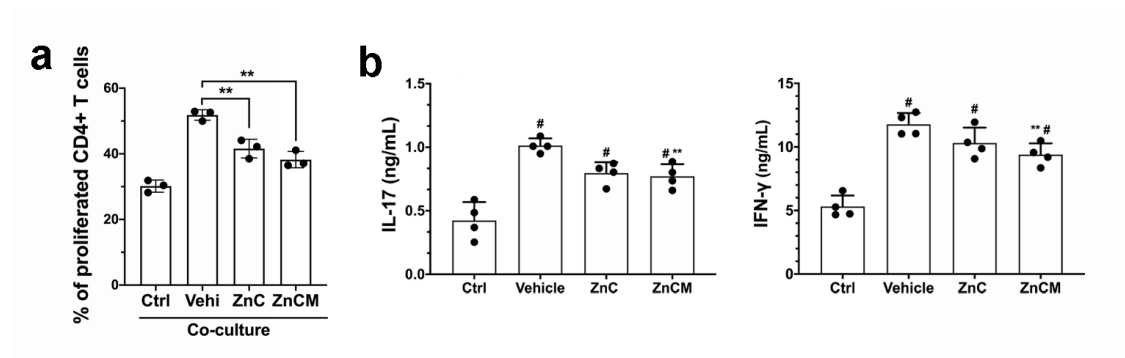

**Supplementary Figure 6. Repression of T cells by tDCs after NPs treatment.** (a) Proliferation of OT-II CD4<sup>+</sup> T cells cocultured with DCs treated with various NPs assessed by

flow cytometry. \*\* indicated the significant difference of  $p \leq 0.05$ . (b) CBA results showed the release of IL-17 and IFN- $\gamma$  from CD4<sup>+</sup> T cells after co-culture with igDCs treated with NPs. \*\* indicated the significant difference of  $p \leq 0.05$  compared with Vehicle, # indicated the significant difference of  $p \leq 0.05$  compared with Ctrl.

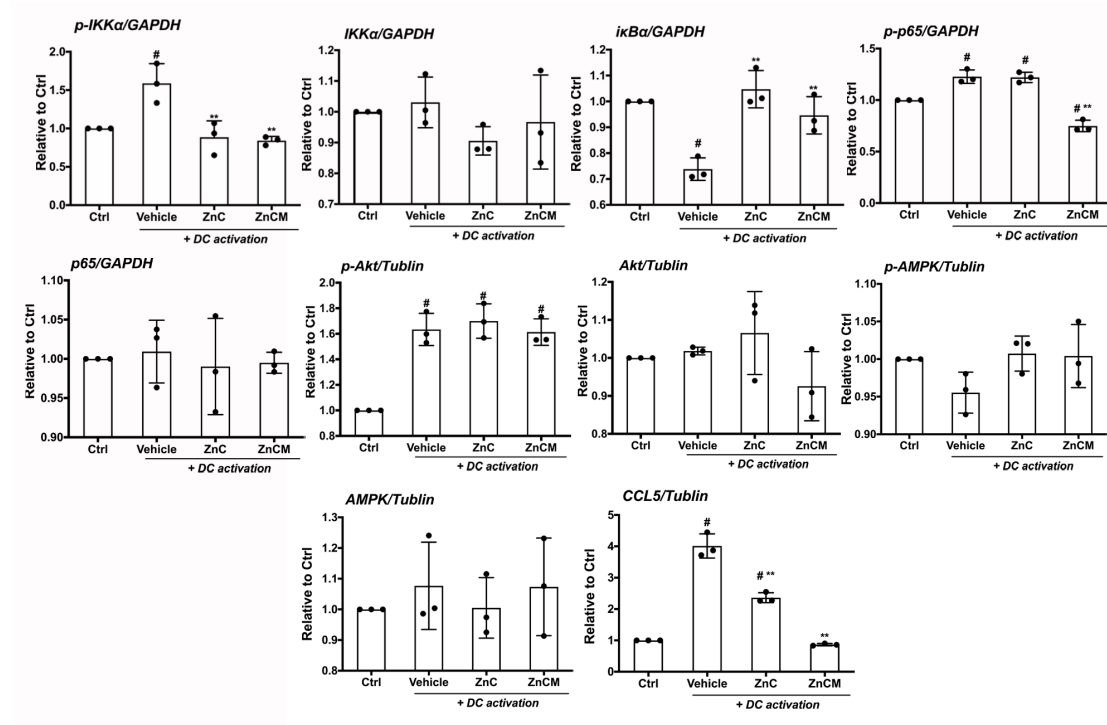

**Supplementary Figure 7.** Quantification of expressed proteins in DCs after NP treatments. \*\* indicated the significant difference of  $p \leq 0.05$  compared with Vehicle, # indicated the significant difference of  $p \leq 0.05$  compared with Ctrl.

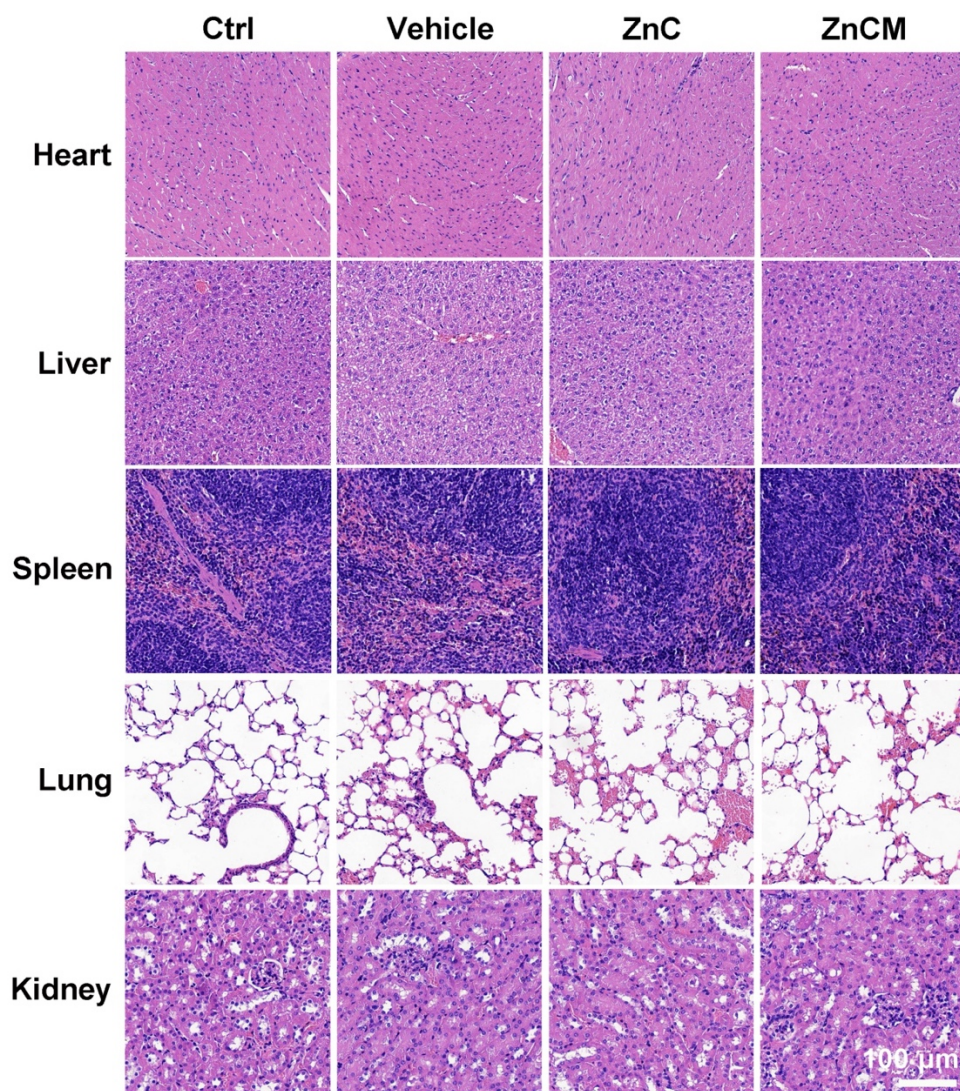

**Supplementary Figure 8. Biosafety of NPs.** The HE histologic images of heart, liver, spleen, lung, and kidney in RA mice injected with varying NPs for 4 weeks.

**Supplementary Table 1. Primers lists.**

| <b>Primer</b> | <b>5' to 3'</b>           |
|---------------|---------------------------|
| <b>UHL3F</b>  | GCCCTGAAGAGAGAGCCAAA      |
| <b>UHL3R</b>  | GGTGCCTCAGTCTGACCTTC      |
| <b>UHL5F</b>  | ACTCAGTGCACGTTTGGCAT      |
| <b>UHL5R</b>  | TGAAGAATGGAGTTTAGCCAGC    |
| <b>BAP1F</b>  | CCAAACGCCAGTGAGAACCT      |
| <b>BAP1R</b>  | ACATGTCACTCCCACTCCCA      |
| <b>UHL1F</b>  | AGTCTGGGGAGAGAGAACCA      |
| <b>UHL1R</b>  | GGGGCTGTAGAACGCAAGAA      |
| <b>USP15F</b> | TCCCTCTACTCCTAATGTGAAAAAC |
| <b>USP15R</b> | AGGCCTGGCTGTTTATTGTT      |
| <b>USP46F</b> | CTTCCCCCATCACACAGCTC      |
| <b>USP46R</b> | GCAGGTCTCAACTCCACCTG      |
| <b>USP14F</b> | CGGGAAATTACGTTTGGGTCC     |
| <b>USP14R</b> | CTTGGGCTGAAAAGGCAAGG      |
| <b>USP21F</b> | GAAGCCGGTGGCCGGT          |
| <b>USP21R</b> | CCCCTTTATCCCCAACAGC       |
| <b>USP49F</b> | AGAACATCAGTGCCACAGG       |
| <b>USP49R</b> | GCCACAAGCAAACGATCCAG      |
| <b>USP38F</b> | GGCGTTGCACTCCAGATTCA      |
| <b>USP38R</b> | TTAAAACCCCTGCCCTCTGG      |
| <b>USP4F</b>  | AGCCTGCAGTCAAATGGATCT     |
| <b>USP4R</b>  | GGCCAGGCTGTATATGAGGTG     |
| <b>USP25F</b> | TCAATGAAGTGATGTTGTGAATGA  |
| <b>USP25R</b> | CAAAAATAGATCGGTGGTAACATGA |
| <b>USP44F</b> | AGCATGTGCACGATGGAAGA      |
| <b>USP44R</b> | TATTGGACAGGAGCTCGGGA      |
| <b>USP22F</b> | TTGGTCTTTTTGCCTGCCCA      |
| <b>USP22R</b> | GTCTCCAACCTGGACCTCAGC     |
| <b>USP3F</b>  | TCAGCCTTTACAGCGGACAG      |
| <b>USP3R</b>  | CTACTAAAGACCTGAGTGACTGAA  |
| <b>USP26F</b> | TCTAGATCCGTGGGGGTCTG      |
| <b>USP26R</b> | CGGTCCTCACTCTGGTTCAC      |
| <b>USP5F</b>  | GGGAGACTGGCTACCCCTTA      |
| <b>USP5R</b>  | CTGGGGTCCAGAACCATGTC      |
| <b>USP13F</b> | ACATTGAGGAGTTACCAGCCC     |
| <b>USP13R</b> | ACTGGCACTTCGTTTTCCCA      |
| <b>USP12F</b> | AGAAAGGATCGAGCGGATGT      |
| <b>USP12R</b> | CAAAGTGAGCTACTGCCCTGA     |
| <b>USP18F</b> | AGGGCGGCTGTGCCTA          |
| <b>USP18R</b> | AATGACCCTCTCAAGCACGG      |



|                 |                        |
|-----------------|------------------------|
| <b>USP39F</b>   | GCTCCCTTCATCTCCTGTGG   |
| <b>USP39R</b>   | ACCCTTAACAAGCCTCAATGGG |
| <b>USP27XF</b>  | GTGTTCTGGATGGGGAAGGG   |
| <b>USP27XR</b>  | TATCCTCGCTCCTCCATGT    |
| <b>USP8F</b>    | ATATACACAGCGCGCAGAAG   |
| <b>USP8R</b>    | GCCCTTTCCTCATCACGATCT  |
| <b>USP33F</b>   | CCACACCTGCCAAATTGAGTT  |
| <b>USP33R</b>   | TGGACCTGGGGGATCCTTTA   |
| <b>PAN2F</b>    | CAGAGGTGGAACCGCTTCAT   |
| <b>PAN2R</b>    | TGAGCAGAACTGCCTCCAG    |
| <b>USP20F</b>   | GCACTACTGTGACGCAGTCT   |
| <b>USP20R</b>   | AGTACAAGCTAGGGGCAGGA   |
| <b>USP45F</b>   | GAAGCTCCTGCGTGTGGAAG   |
| <b>USP45R</b>   | ATCATGAGGCAGCAGTGGTC   |
| <b>USP48F</b>   | ATCCAGACCCGTAAACCCA    |
| <b>USP48R</b>   | CCTGGGCTTGCAGCCTATAA   |
| <b>USPL1F</b>   | ACAGCTCTCCACCATTGAGC   |
| <b>USPL1R</b>   | CCTTCCTGCTCCCTCAACAG   |
| <b>USP1F</b>    | GAAGGGCCATGACCGGATTT   |
| <b>USP1R</b>    | GACTGCCTCTTGAAAGCCCA   |
| <b>USP2F</b>    | CTCCATCCAGTGCCCCCAAC   |
| <b>USP2R</b>    | CCATAGCCCGGTTTGGCAT    |
| <b>USP10F</b>   | TTTGTGACTCCCCGCTCTTC   |
| <b>USP10R</b>   | CTGGTGCTCCTGTCCATCTG   |
| <b>USP36F</b>   | CGAAGGCTGACAGTCCAGG    |
| <b>USP36R</b>   | TCTCTGCAGCAGGTAAGGGA   |
| <b>SENP2F</b>   | CTGCTCAGGCCTGGAATGT    |
| <b>SENP2R</b>   | CAGCTGGAACGGGAATCCAA   |
| <b>CYLDF</b>    | CAGGTAGCAGGTTCCGGCTG   |
| <b>CYLDR</b>    | ACTGGCAAAAAGGAGCCACT   |
| <b>YOD1F</b>    | TCAGACCTGTCCTCTGGGTT   |
| <b>YOD1R</b>    | TGCTCAAGTGGTAAAGGTAAGC |
| <b>OTUD3F</b>   | GCTTAATGCCCTTTGTGGC    |
| <b>OTUD3R</b>   | CCGGACGCTGTCATAGTGTT   |
| <b>OTUB2F</b>   | TCTGCCACCTAGGTCCCTCC   |
| <b>OTUB2R</b>   | GTGTCCTTGCCTCAGGTCTC   |
| <b>OTUD6AF</b>  | TCGAGAATATGCCTCCACGC   |
| <b>OTUD6AR</b>  | GCGACCTTTTCCTCCTCCTC   |
| <b>TNFAIP3F</b> | CCTGCCAGCAGGTATATGGG   |
| <b>TNFAIP3R</b> | CAAGGCCTGAAGAGGAAGGG   |
| <b>OTUB1F</b>   | TCCCCAGCTTTCCAACCATC   |
| <b>OTUB1R</b>   | GCCTATGGGAGCAGAACTCC   |

|                  |                           |
|------------------|---------------------------|
| <b>ZRANB1F</b>   | CCGCGGGGTTTATTTAGCTC      |
| <b>ZRANB1R</b>   | AGTCAGGACATGTTCTCCGC      |
| <b>ALG13F</b>    | CCTTTAATTCTAACCTTTGGGAGCC |
| <b>ALG13R</b>    | CTCTGGGTAGAAAAGGATGGC     |
| <b>ATXN3F</b>    | CCCTCAAAGCAGACCTGGAG      |
| <b>ATXN3R</b>    | TACTGAGCTGAATGGCCCTG      |
| <b>JOSD1F</b>    | CACTGGCCTGCTTCTTCTCC      |
| <b>JOSD1R</b>    | CGAGGCCTCTGCCACTTG        |
| <b>JOSD2F</b>    | CCATTGCTAGCAGGAGCTGA      |
| <b>JOSD2R</b>    | CTTGCAGATTCGTCGGCAG       |
| <b>STAMPB1F</b>  | TTCACGAAAGGTGGGAAGGG      |
| <b>STAMPB1R</b>  | AAGGAGTGTTGAGACCAGGC      |
| <b>PSMD14F</b>   | AAAGGAAGCCGAAGGAAGCC      |
| <b>PSMD14R</b>   | CTCGGAGAACAGGCGATGAA      |
| <b>BRCC3F</b>    | GGAGCAAACCAGCAGCATT       |
| <b>BRCC3R</b>    | GCCAGGTATTTTCATCTGCCC     |
| <b>COPS5F</b>    | GCCTTGAGAGTCTATCACCCT     |
| <b>COPS5R</b>    | TGATGATCATGGTCTCGCCG      |
| <b>STAMBPL1F</b> | CATCCTCACACCAAGGACCC      |
| <b>STAMBPL1R</b> | TCACACACGTCCACAGATGG      |
| <b>EIF3FF</b>    | TCGAGGTTTTACACACAGGG      |
| <b>EIF3FR</b>    | ATGCTTCTTTCTCCTGGCCG      |
| <b>UFSP1F</b>    | TGGGCCTGGCACAATGATAC      |
| <b>UFSP1R</b>    | CAGCTTGGCCTTGCTGTGTA      |
| <b>SENP5F</b>    | CCGGGAGCAAAGAACGTACA      |
| <b>SENP5R</b>    | GCTTCCAAACCAGCATTCC       |
| <b>SENP8F</b>    | ACAAAGAATCCGCAATGCC       |
| <b>SENP8R</b>    | ACTCAAGACCACAGGGTCCA      |
| <b>SENP7F</b>    | CGCGAATCTCACTTCTGGCT      |
| <b>SENP7R</b>    | ATCTCTGATGAAGCTCGCCG      |
| <b>SENP1F</b>    | GAGTAAAGAAGGTTCCGGTTCCC   |
| <b>SENP1R</b>    | CCGCCACTCACCGAACC         |
| <b>SENP3F</b>    | TGGCCTAGACGCGCTGA         |
| <b>SENP3R</b>    | CCAAAACCACCACCGGACT       |
| <b>ZC3H12AF</b>  | TGCTGTGTACAGAGGCGAGA      |
| <b>ZC3H12AR</b>  | CCACCATGTGGTTGCTGACA      |
| <b>UFD1LF</b>    | CAGTGCAGCATGAGGAGTCA      |
| <b>UFD1LR</b>    | GAACCAGAGAAGGCACGGAA      |
| <b>TAF1DF</b>    | ACTTGCTGGTGGAACGCTAA      |
| <b>TAF1DR</b>    | CTGCAGATGAGCAAAGGGC       |
| <b>TRIM44F</b>   | ATGCCCATTCACACTCGGAA      |
| <b>TRIM44R</b>   | TCCTGGAAGGAACAATGAATACT   |

|                                 |                        |
|---------------------------------|------------------------|
| <b>IL-1<math>\beta</math></b>   | TTCAAGGGGACATTAGGCAG   |
| <b>IL-6</b>                     | CAACGATGATGCACTTGCAGA  |
| <b>IL-12<math>\alpha</math></b> | CTGTGCCTTGGTAGCATCTATG |
| <b>IL-12<math>\beta</math></b>  | GTGGAATGGCGTCTCTGTCT   |
| <b>TNF-<math>\alpha</math></b>  | CTCAGCGAGGACAGCAAGG    |
